# Supplementary material
Source: Springer Nature journal article supplement (http://www.springermedizin.de/resource/supplementary/12883_2012_876_MOESM1_ESM.pdf/9456068)
Supplement: MOESM1 [file 9456068]

Beneficiaries in 5% Medicare sample  
Q1 2007 to Q4 2009  
(N = 2,051,066)

Aged  $\geq 65$  years  
(n = 1,634,708)

$\geq 1$  ALS claim\* from Q1 2007 to Q4 2009  
(n = 1570)

$\geq 2$  ALS claims\* from Q1 2007 to Q4 2009  
(n = 1149)

In data set  $\geq 2$  years before first claim  
(n = 399)

First ALS claim\* from Q1 2008 to Q4 2009  
(n = 272)<sup>†</sup>
